# Supplementary material for: Genomic Study of RNA Polymerase II and III SNAPc-Bound Promoters Reveals a Gene Transcribed by Both Enzymes and a Broad Use of Common Activators
Source: PubMed Central journal article supplement (PMC3499247; doi:10.1371/journal.pgen.1003028), 2012-11-15
Supplement: pgen.1003028.s010.pdf [file pgen.1003028.s010.pdf]

**Z-motif**

---

|                |      |                           |       |
|----------------|------|---------------------------|-------|
| RMRP -         | -149 | <b>TAGCCACAATGCCTCTG</b>  | -133  |
| RN7SK +        | -198 | <b>TATCCAGAATGCCTTGC</b>  | -214* |
|                | -142 | <b>TTCCCAAATGCTAAAG</b>   | -158  |
| RNU6 - (U6-1)  | -239 | <b>TTCCCATGATTCCTTCA</b>  | -223* |
| RNU6 + (U6-2)  | -316 | <b>ATCCCAGCGTCTCTGC</b>   | -332  |
|                | -228 | <b>CACCCACAATCCACCGC</b>  | -212* |
| RNU6 + (U6-7)  | -323 | <b>CTCCCGGCATGCTCTGC</b>  | -307  |
|                | -244 | <b>TACCCAGGGTGCCCCGG</b>  | -228* |
| RNU6 - (U6-8)  | -323 | <b>CTCCCGGCATGCTCCGC</b>  | -307  |
|                | -245 | <b>TACCCAGGGTGCCCCGG</b>  | -229* |
| RNU6 + (U6-9)  | -262 | <b>CTCCAGAAGTCTTTGG</b>   | -278* |
|                | -199 | <b>TTCCAGCAGCCACCGT</b>   | -183* |
| RNY1 -         | -213 | <b>TTCCAGGATGCTTAGC</b>   | -197* |
| RNY3 +         | -275 | <b>CTCCACGGTGCCCCCG</b>   | -291  |
|                | -234 | <b>CACCCACAATGCTTTGA</b>  | -218* |
| RNY4 +         | -218 | <b>TTCCCATCATGCAACTA</b>  | -202* |
| RNY5 +         | -228 | <b>TACCCACAATGCATTTG</b>  | -212* |
| RPPH1 -        | -163 | <b>CACCCAGCGCGGTGCG</b>   | -147  |
|                | -70  | <b>TTCCAGAACACATAGC</b>   | -86*  |
| TRNAU1 -       | -231 | <b>TTCCAGAATGCGTGGC</b>   | -215* |
|                |      |                           |       |
| RNU1 - (U1-1)  | -244 | <b>CACCGACAGTGCCTTGC</b>  | -260* |
| RNU1 - (U1-2)  | -243 | <b>CACCGACAGTGCCTTGC</b>  | -259* |
| RNU1 + (U1-3)  | -243 | <b>CACCGACAGTGCCTTGC</b>  | -259* |
| RNU1 + (U1-4)  | -243 | <b>CACCGACAGTGCCTTGC</b>  | -259* |
| RNU1 - (U1-5)  | -242 | <b>CACCGACAGCGCCTTCC</b>  | -258* |
| RNU1 - (U1-6)  | -242 | <b>CACCGACAGCGCCTTCC</b>  | -258* |
| RNU1 - (U1-8)  | -259 | <b>CACCGACAGTGCCTTTC</b>  | -275* |
| RNU1 + (U1-11) | -133 | <b>CACCCCGACAGCACTCG</b>  | -149* |
|                | -100 | <b>CCCCCTCGCTCCACCGT</b>  | -116  |
| RNU1 - (U1-12) | -133 | <b>CACCCCGACAGCACTCG</b>  | -149* |
|                | -100 | <b>CCCCCTCGCTCCACCGT</b>  | -116  |
| U1-like-1 -    | -250 | <b>CACCGACAACGCCTTCT</b>  | -266* |
| U1-like-2 +    | -250 | <b>CACCGACAGCGCCTTTC</b>  | -266* |
| U1-like-3 +    | -254 | <b>CACCGACAGTGCCTTTC</b>  | -270* |
| U1-like-4 -    | -279 | <b>ATCCCACCCCTCCGCCAC</b> | -295* |
| U1-like-5 +    | -275 | <b>GCCCCACCCCTCCGCCGA</b> | -291* |
| U1-like-6 +    | -295 | <b>GCCCCACCCCTCCGCCGA</b> | -311* |
| U1-like-7 -    | -288 | <b>GCCCCACCCCTCCGCCGA</b> | -304* |
| U1-like-8 -    | -286 | <b>GCCCCACCCCTCCGCCGA</b> | -302* |
| U1-like-9 +    | -287 | <b>GCCTCACCCAACGCCCC</b>  | -303* |
| RNU2 - (U2-2)  | -259 | <b>ATCCCAGGATCCTAAAA</b>  | -243  |
| U2-like -      | -192 | <b>TTCCCATAGCTCCTGAG</b>  | -208* |
| RNU4 - (U4-1)  | -217 | <b>TTCCCCAGCGTCCCAAG</b>  | -201* |
| RNU4 - (U4-2)  | -215 | <b>CTCCCATAGTGCTTTGC</b>  | -199* |
| U4ATAC +       | -189 | <b>TACCCAGAAGACCGCGC</b>  | -205* |
| RNU5 + (U5A)   | -196 | <b>TACCATAATACACTGC</b>   | -180* |
| RNU5 - (U5Ds)  | -209 | <b>TACCCACAATGCACTGC</b>  | -193* |
| RNU5 + (U5E)   | -215 | <b>TACCCACAATGCATTTG</b>  | -199* |
|                | -123 | <b>GTCCAGAATTGTCTGA</b>   | -107  |

|                 |      |                          |       |
|-----------------|------|--------------------------|-------|
| RNU5 - (U5F)    | -222 | <b>ATCCCAGAATGCATTGT</b> | -206* |
| U5A-like -      | -203 | TACCCATAGTACCCTGC        | -187* |
| U5b-like +      | -205 | <b>TACCCATAATGCACTGC</b> | -189* |
| U5E-like-1 -    | -217 | <b>TACCCACAATGCATTGT</b> | -201  |
|                 | -123 | <b>GTTCCAGAATTGTCTGA</b> | -107* |
| U5E-like-2 -    | -211 | <b>TACCCATGGTGCACCAC</b> | -195* |
| SNORD118 - (U8) | -186 | <b>TTCCCAGAATGCTCCGA</b> | -202* |
| RNU11 + (U11)   | -240 | <b>TTCCCAGCAAGCCCTGA</b> | -224* |
| RNU12 + (U12)   | -237 | TTCCCCGTGAGCCTTCG        | -221* |
| UNKNOWN-1 +     | -251 | CACCAACAGTGCCTTTC        | -267* |
| UNKNOWN-4 +     | -196 | <b>TTCCCAGGAGACTCCTG</b> | -212* |
| UNKNOWN-6 -     | -288 | <b>TTCCCAAGATTCCAGTG</b> | -272  |
|                 | -221 | <b>GCCCCGCCGTGCCCTGC</b> | -237* |
| UNKNOWN-7 -     | -117 | <b>TAACCATGGTGCCTGC</b>  | -101* |
