# Supplementary material for: Genomic Study of RNA Polymerase II and III SNAPc-Bound Promoters Reveals a Gene Transcribed by Both Enzymes and a Broad Use of Common Activators
Source: PubMed Central journal article supplement (PMC3499247; doi:10.1371/journal.pgen.1003028), 2012-11-15
Supplement: pgen.1003028.s011.pdf [file pgen.1003028.s011.pdf]

### GA-motif

---

|                 |       |                  |        |
|-----------------|-------|------------------|--------|
| RNU6ATAC -      | -362  | <b>ACGGAAGTG</b> | -370*  |
| RNU1 - (U1-1)   | -319  | <b>GAGGAAGTG</b> | -327*  |
| RNU1 - (U1-2)   | -318  | GGGGAAGTG        | -326*  |
| RNU1 + (U1-3)   | -318  | GGGGAAGTG        | -326*  |
| RNU1 + (U1-4)   | -318  | <b>GAGGAAGTG</b> | -326*  |
| RNU1 - (U1-5)   | -210  | GAGGCAGCG        | -202*  |
| RNU1 - (U1-6)   | -210  | GAGGCAGCG        | -202*  |
| RNU1 - (U1-7)   | -337  | <b>GAGGAAGTG</b> | -345*  |
| RNU1 - (U1-8)   | -334  | <b>GGGGAAGTG</b> | -342*  |
| U1-like-1 -     | -288  | <b>GCGGAAGAG</b> | -280*  |
| U1-like-2 +     | -335  | <b>GAGGAAGTG</b> | -343   |
|                 | -288  | <b>GCGGAAGAG</b> | -280*  |
|                 | -147  | <b>CCGGAAGTC</b> | -155   |
| U1-like-3 +     | -329  | GGGGAAGTG        | -337*  |
| U1-like-5 +     | -276  | <b>GCGGAAGAG</b> | -268*  |
| U1-like-6 +     | -344  | <b>GAGGAAGTG</b> | -352*  |
|                 | -296  | <b>GCGGAAGAG</b> | -289*  |
| U1-like-7 -     | -337  | <b>GAGGAAGTG</b> | -345*  |
|                 | -289  | <b>GCGGAAGAG</b> | -281*  |
| U1-like-8 -     | -335  | <b>GAGGAAGTG</b> | -343*  |
|                 | -287  | <b>GCGGAAGAG</b> | -279*  |
| U1-like-9 +     | -288  | <b>GCGGAAGAG</b> | -280*  |
| U2-like -       | -1172 | CTGGGAGTG        | -1164* |
| RNU3 + (U3-1)   | -267  | <b>CCGGAAGTG</b> | -275*  |
| RNU3 + (U3-2)   | -267  | <b>CCGGAAGTG</b> | -275*  |
| RNU3 - (U3-2b)  | -267  | <b>CCGGAAGTG</b> | -275*  |
| RNU3 - (U3-3)   | -267  | <b>CCGGAAGTG</b> | -275*  |
| RNU3 - (U3-4)   | -267  | <b>CCGGAAGTG</b> | -275*  |
| RNU4ATAC +      | -464  | CCGGAATG         | -472*  |
| RNU5 + (U5A)    | -230  | <b>CCGGAATA</b>  | -238   |
| RNU5 - (U5Ds)   | -306  | <b>GCGGAAGCC</b> | -314   |
| SNORD118 - (U8) | -271  | GCGGAAGGG        | -263*  |
| RNU11 + (U11)   | -312  | CCGGAAGGA        | -304*  |
| RNU12 + (U12)   | -303  | <b>CCGGAAGTA</b> | -311*  |
|                 | -255  | <b>CCGGAAGGG</b> | -247   |
| SNORD13 + (U13) | -357  | CCGACCTA         | -349*  |
| UNKNOWN-1 +     | -339  | GGGGAAGTG        | -347*  |
